# Supplementary material
Source: publisher figshare collection journal article supplement (https://tandf.figshare.com/articles/dataset/_/21829413)
Supplement: Supplementary file 1 [file 1]

## Gebruik van voorzieningen door slachtoffers in het Centrum Seksueel Geweld

Iva Bicanic<sup>1</sup>, Hanneke Snetselaar<sup>1</sup>, Ad de Jongh<sup>2,3</sup> en Elise van de Putte<sup>4</sup>

<sup>1</sup>Landelijk Psychotraumacentrum WKZ, Universitair Medisch Centrum Utrecht; <sup>2</sup>Afdeling Orthodontie & Sociale Tandheelkunde, Academisch Centrum Tandheelkunde Amsterdam van de Universiteit van Amsterdam en Vrije Universiteit Amsterdam; <sup>3</sup>School of Health Sciences, Salford University, Manchester, Groot-Brittannië;

<sup>4</sup>Afdeling Pediatrie, WKZ, Universitair Medisch Centrum Utrecht.

### Samenvatting

Achtergrond: Eind jaren negentig leidde onderzoek onder verkrachte vrouwen tot de aanbeveling om zogenaamde *Rape Centers* op te zetten in Nederland, vanwege de voordelen voor het herstel van slachtoffers die anders tegen een gefragmenteerd zorgsysteem aanlopen. Pas in 2012 werd dit gerealiseerd in het Universitair Medisch Centrum Utrecht onder de naam Centrum Seksueel Geweld. Het doel van dit centrum is om op één locatie 24/7 voorzieningen van medische, forensische en psychologische disciplines geïntegreerd aan te bieden aan acute slachtoffers van een verkrachting.

Doel: De huidige studie beschrijft de demografische en traumagerelateerde kenmerken van acute slachtoffers van een verkrachting alsook hun gebruik van voorzieningen in het Centrum Seksueel Geweld met als doel om het huidige zorgaanbod te verbeteren.

Methode: Van januari 2012 tot september 2013 zijn gegevens verzameld van 108 patiënten, die binnen één week na het meemaken van een verkrachting in het Centrum Seksueel Geweld zijn opgevangen. Om de populatie te beschrijven, zijn de demografische en traumagerelateerde kenmerken bepaald.

Resultaten: De slachtoffers waren gemiddeld 21.3 jaar oud ( $SD = 9.8$ ) en bestonden voornamelijk uit meisjes en vrouwen (91.7%). Velen rapporteerden risicofactoren waarvan vast staat dat ze het ontstaan van een post-traumatische stress stoornis (PTSS) en revictimisering verhogen zoals eerder seksueel trauma (32.4%), eerder gebruik van geestelijke gezondheidszorg (45.4%), en niet inwonend bij de biologische ouders (61.7%). De meerderheid (88.9%) consulteerde het centrum binnen 72 uur na de verkrachting. Het gebruik van de zorg was aanzienlijk: 82.4% ontving medische hulp op de Spoedeisende Hulp, 61.7% onderging een forensisch-medisch onderzoek, 34% deed aangifte bij de politie en 82.4% maakte gebruik van psychologische zorg.

Conclusies: De bevindingen geven aanleiding tot een aantal aanbevelingen ter verbetering van het huidige zorgaanbod in het Centrum Seksueel Geweld. Om PTSS en revictimisering na een verkrachting te voorkomen, kan traumagerichte behandeling mogelijk beter direct worden ingezet in plaats van ‘*watchful waiting*’. Het huidige forensische onderzoek kan worden verbeterd door behalve bij kinderen, ook bij volwassenen standaard top-tot-teen onderzoek in te zetten.

**Keywords:** verkrachting; aanranding; spoedeisende hulp; GGZ; Post Traumatische Stress Stoornis (PTSS).

## Introductie

Een aanzienlijk deel van de Nederlandse bevolking maakt een verkrachting mee; 2.6% van de mannen en 11.7% van de vrouwen tussen 15 en 70 jaar rapporteert in zijn of haar leven tenminste één keer te zijn verkracht (De Haas, Van Berlo, Bakker, & Vanwesenbeeck, 2012). Elk jaar worden 0.4% van de mannen en 2.3% van de vrouwen boven de 15 jaar geconfronteerd met één of meer negatieve seksuele ervaringen (Merens, Hartgers, & Van den Brakel, 2012). Voor vrouwen betreft 19% van deze ervaringen (een poging tot) een verkrachting.

Ondanks de negatieve gevolgen van seksueel geweld op het geestelijk, seksueel en lichamelijk functioneren (Linden, 2011; Postma, Bicanic, Van der Vaart, & Laan, 2013; Rees et al., 2011), maken de meeste slachtoffers verrassend genoeg geen gebruik van professionele hulp en doet slechts een minderheid aangifte bij de politie (Campbell & Wasco, 2005; Wolitzky-Taylor et al., 2011). In Nederland is gebleken dat slachtoffers na een verkrachting geconfronteerd worden met een gefragmenteerd zorgsysteem met lange wachttijden en (daardoor) relatief langzaam herstellen (Ensink & Van Berlo, 1999). Slachtoffers die direct worden opgevangen binnen een geïntegreerd hulpaanbod vormen hier een uitzondering op, maar zijn in de minderheid. De resultaten van de studie van Ensink en Van Berlo (1999) leidden destijds tot de aanbeveling om multidisciplinaire *Rape Centers* in Nederland op te zetten, analoog aan reeds bestaande centra in de Verenigde Staten en Scandinavië (Bramsen, Elklit, & Nielsen, 2009; Campbell, Patterson, & Lichty, 2005). Zover kwam het echter niet, en de aandacht voor de multidisciplinaire aanpak van seksueel geweld verslapte. De laatste jaren krijgt de gedachte achter deze aanpak opnieuw vaste voet in Nederland en zijn verschillende initiatieven gestart op dit terrein, mede geïnspireerd door onderzoek waaruit blijkt dat een geïntegreerde werkwijze effectiever is dan een gefragmenteerde aanpak wat betreft het faciliteren van herstel en het vergroten van kansen om de verdachte aan te houden (Campbell, Patterson, Adams, Diegel, & Coats, 2008; Campbell, Patterson, & Bybee, 2012).

In januari 2012 is het eerste *Rape Center* in Nederland geopend in het UMC Utrecht (UMCU) onder de naam Centrum Seksueel Geweld. Het centrum hanteert de Spoedeisende Hulp als ingang, en biedt daar 24-uurs medische, forensische en psychologische voorzieningen aan elke persoon die aangeeft slachtoffer te zijn van een verkrachting die korter dan één week geleden heeft plaatsgevonden. De medische voorzieningen omvatten de noodzakelijke medische zorg. De forensische voorzieningen zijn erop gericht het forensisch-medisch onderzoek onder optimale voorwaarden uit te voeren. De psychologische voorzieningen focussen op het verlagen van initiële stress bij het slachtoffer en diens omgeving, omdat een hoge mate van stress een stagnatie in de verwerking voorspelt (Alisic, Jongmans, Van Wesel, & Kleber, 2011; Bryant & Panasetis, 2001). Hiervoor wordt het ‘*watchful waiting*’ protocol (National Institute for Clinical Excellence (NICE, 2005) ingezet, waarmee stressreacties van het slachtoffer nauwlettend worden gemonitord. Ouders of verzorgers van minderjarige slachtoffers ontvangen parallelle begeleiding, omdat een hoge mate van ouderlijke stress voorspellend is voor het ontstaan van een Post Traumatische Stress Stoornis (PTSS) bij kinderen (Alisic et al., 2011). Wanneer desondanks een PTSS ontstaat, wordt een *evidence-based* traumabehandeling gestart.

Anno 2014 wordt de multidisciplinaire aanpak - medische, forensische en psychologische voorzieningen op één locatie - bij acute slachtoffers van seksueel geweld op vier plaatsen in Nederland protocollair toegepast. Mogelijk neemt het bewustzijn van de voordelen van deze aanpak onder hulpverleners en beleidmakers toe (Goderie & Flikweert, 2012; Vanoni, Kriek, & Linneman, 2013). Om de huidige aanpak verder te verbeteren, is nader inzicht nodig betreffende de kenmerken van slachtoffers en hun gebruik van de voorzieningen. Dit onderzoek maakte hiervoor gebruik van de database van het Centrum Seksueel Geweld UMCU, waarin gegevens zijn verzameld tot minimaal twee maanden na de verkrachting; de periode die minimaal nodig is voor het verstrekken van medische zorg en de behandeling van PTSS-klachten, met inbegrip van vervolgafspraken.

### Methodie

#### *Dataverzameling*

Dit onderzoek is uitgevoerd in het Centrum Seksueel Geweld UMCU, dat zich richt op slachtoffers van 0-100 jaar die korter dan één week geleden (een poging tot) een verkrachting hebben meegemaakt. Alle patiënten ouder dan 16 jaar (en ouder(s)/verzorgers van patiënten van 0 tot 16 jaar), die het centrum tussen januari 2012 en september 2013 fysiek bezochten, zijn na instemming geïnccludeerd in de studie. Persoonsgegevens zijn geanonimiseerd, en specifieke details van de gebeurtenis zijn achterwege gelaten.

De werkwijze in het Centrum Seksueel Geweld verloopt gestandaardiseerd. De patiënt wordt getrieerd door een getrainde (forensisch) verpleegkundige. Bij patiënten die de intentie hebben om aangifte te doen, wordt in opdracht van de politie forensisch-medisch sporenonderzoek verricht conform de eisen die het Nederlands systeem stelt. De scheiding van de taken van de forensisch en curatieve arts is gewaarborgd in het centrum. Acute medische zorg omvat behandeling van eventueel letsel, verstrekken van de *morning after* pil en profylactische behandeling van seksueel overdraagbare aandoeningen (SOA's) met inbegrip van HIV en Hepatitis B en C. De patiënt wordt geïnformeerd over medische vervolgafspraken, zoals het monitoren van HIV Post-Exposure Profylaxis (PEP) en het testen van Hepatitis B en C, en over bijwerkingen van medicatie. Indien gewenst kunnen patiënten gebruik maken van een douche en schone kleding. Direct na het bezoek wordt een casemanager toegewezen aan de patiënt om vervolgafspraken te coördineren en contact te leggen met de bestaande hulpverlening. Tevens is deze casemanager verantwoordelijk voor het bieden van psychologische zorg volgens het '*watchful waiting protocol*' (NICE, 2005) gedurende de eerste maand na de verkrachting. Wanneer ondanks deze laagdrempelige interventie toch een PTSS ontstaat, wordt *evidence-based* behandeling geboden: cognitieve gedragstherapie (CGT) of EMDR. Als het minderjarigen betreft, wordt parallelle begeleiding van ouders of verzorgers ingezet. Adolescenten van 16 jaar of ouder kunnen gebruik maken van de voorzieningen van het centrum zonder dat hun ouders daarvan op de hoogte zijn. In het UMCU maken de medische en psychologische hulpverleners gebruik van hetzelfde elektronische patiëntendossier, waardoor overvragen van de patiënt of het ontstaan van lacunes in de zorg wordt voorkomen.

Tussen januari 2012 en september 2013 ontving het Centrum Seksueel Geweld e-mails en telefoontjes van politie (15%), (geestelijke) gezondheidszorg (52.5%) en slachtoffers zelf (32.5%) betreffende 659 (vermeende) slachtoffers van seksueel geweld. Hun gemiddelde

leeftijd was 17.7 jaar ( $SD = 10.1$ ). De meeste slachtoffers waren vrouw (86.8%). Van deze e-mails en telefoontjes ( $N = 659$ ), werden 407 slachtoffers niet aangemeld bij het UMCU vanwege lange reisafstand, woonachtig zijn in het buitenland, bezorgdheid van het slachtoffer over borging van anonimiteit en weerstand tegen de betrokkenheid van professionals. Voor de overige 252 slachtoffers (38.4%) is inschrijving bij het UMCU gerealiseerd om medische en/of psychologische zorg te kunnen verstrekken. Van deze 252 slachtoffers was voor 144 slachtoffers de verstreken tijd sinds de verkrachting langer dan één week. Gelet op het doel van dit onderzoek zijn uitsluitend slachtoffers geïncludeerd die binnen één week na de verkrachting werden aangemeld bij het Centrum Seksueel Geweld. Dit betrof 108 slachtoffers.

### *Meetinstrumenten*

Ten behoeve van dit onderzoek is informatie uit het elektronisch patiëntendossier betreffende de gebeurtenis gecodeerd ingevoerd in de database van het Centrum Seksueel Geweld.

Patiëntgerelateerde kenmerken omvatten informatie over geslacht, leeftijd, etniciteit, huidige woonsituatie, gezinsstructuur, betrokken geestelijke gezondheidszorg, aanwezigheid van een cognitieve beperking, zwangerschap, huidig gebruik van voorgeschreven medicatie, vluchtelingenstatus, eerder seksueel geweld, eerdere fysieke mishandeling en aanwezigheid van een kinderschermingsmaatregel.

Traumagerelateerde kenmerken omvatten informatie over type seksueel geweld, gebruik van fysiek geweld, gebruik van alcohol of drugs door het slachtoffer voorafgaand aan het seksueel geweld, geslacht van de pleger, (geschatte) leeftijdscategorie van de pleger, aantal plegers en relatie tot de pleger.

Kenmerken gerelateerd aan voorzieningen omvatten informatie over eerder gebruik van het centrum, aantal betrokken disciplines (maximaal 3), verstreken tijd sinds de verkrachting (in dagen), gebruik van acute medische zorg, betrokken medisch specialisten, (behandeling van) fysiek letsel gerelateerd aan het seksueel geweld, voorgeschreven medicatie, diagnostiek van SOA's, betrokkenheid van politie, inzet van forensisch-medisch onderzoek, aangifte, inzet van casemanagement, inzet van PTSS behandeling en inzet van een kinderschermingsmaatregel.

### *Data analyse*

Om de geïncludeerde populatie te beschrijven, zijn de demografische en traumagerelateerde kenmerken in categorische en continue variabelen bepaald. Statistische analyses werden uitgevoerd met behulp van SPSS (IBM SPSS Statistics for Windows, Version 20.0. Armonk, NY: IBM Corp.).

## **Resultaten**

De 108 patiënten, die slachtoffer waren van een verkrachting korter dan één week geleden, werden naar het centrum verwezen door politie (61.9%) of (geestelijke) gezondheidszorg (27.6%). Bij 11.5% betrof het een zelfverwijzing.

### *Patiëntgerelateerde kenmerken*

## GEBRUIK VAN VOORZIENINGEN IN HET CENTRUM SEKSUEEL GEWELD

De demografische en achtergrondkenmerken van de 108 patiënten zijn beschreven in Tabel 1. Leeftijd varieerde van 3 tot 59 jaar, met een gemiddelde leeftijd van 21.3 jaar ( $SD = 9.8$ ). Van de totale patiëntengroep viel 68.5% in de leeftijdscategorie van 12 tot 25 jaar. Een aanzienlijk deel van de groep rapporteerde eerder seksueel misbruik (32.4%), eerdere fysieke mishandeling (29.6%) en reeds aanwezige 1<sup>e</sup>, 2<sup>e</sup> of 3<sup>e</sup> lijns hulpverlening (45.4%). Een kwart (25.3%) was dakloos of woonde in een residentiële of pleegsetting. Van de minderjarigen woonde 61.7% niet bij beide biologische ouders.

Tabel 1. *Demografische en achtergrondkenmerken van de slachtoffers (N=108) op het moment van aanmelding in aantallen en percentages.*

|                                                                  | N  | %    |
|------------------------------------------------------------------|----|------|
| Geslacht                                                         |    |      |
| Vrouw                                                            | 99 | 91.7 |
| Man                                                              | 9  | 8.3  |
| Leeftijdscategorie                                               |    |      |
| < 12 jaar                                                        | 7  | 6.5  |
| 12–17 jaar                                                       | 40 | 37.0 |
| 18–25 jaar                                                       | 34 | 31.5 |
| > 25 jaar                                                        | 27 | 25.0 |
| Etniciteit <sup>a</sup>                                          |    |      |
| Westers                                                          | 95 | 88.0 |
| Niet-Westers                                                     | 13 | 12.0 |
| Woonsituatie                                                     |    |      |
| Woont met ouder(s)                                               | 45 | 41.6 |
| Woont met partner                                                | 10 | 9.2  |
| Woont alleen                                                     | 17 | 15.6 |
| Residentiële zorg of pleegzorg                                   | 21 | 19.3 |
| Dakloos                                                          | 6  | 6.0  |
| Onbekend                                                         | 9  | 8.3  |
| Vluchtelingenstatus                                              | 5  | 4.6  |
| Eerder seksueel misbruik                                         | 35 | 32.4 |
| Eerdere fysieke mishandeling                                     | 32 | 29.6 |
| Betrokken geestelijke gezondheidszorg                            | 49 | 45.4 |
| Gebruik van voorgeschreven medicatie                             | 53 | 57.6 |
| Aanwezigheid cognitieve beperking                                | 15 | 16.2 |
| Gezinsstructuur – alleen minderjarigen geïncludeerd ( $n = 47$ ) |    |      |
| Compleet                                                         | 14 | 29.8 |
| Incompleet door scheiding of dood                                | 29 | 61.7 |
| Onbekend                                                         | 4  | 8.5  |
| Aanwezigheid kindbeschermingsmaatregel                           | 13 | 27.7 |

<sup>a</sup> Westers wordt gebruikt als het geboorteland Europa, Verenigde Staten of Australië is.

*Traumagerelateerde kenmerken*

In tabel 2 zijn de kenmerken van het trauma en de plegers gepresenteerd. In 93.5% van de gevallen was sprake van penetratie (oraal, vaginaal, anaal of een combinatie). Voor 77 van de 108 slachtoffers (71.3%) vond de verkrachting eenmalig plaats. Bij 7 van de 108 slachtoffers (6.5%) betrof het trauma twee incidenten van seksueel geweld. Bij 20 van de 108 slachtoffers (18.5%) was sprake van een reeks van drie of meer incidenten van seksueel geweld. Van vier slachtoffers waren de gegevens betreffende de frequentie niet beschikbaar (3.7%). De pleger was in de meeste gevallen (86.1%) een man ouder dan 18 jaar. Groepsverkrachting kwam in 24.1% van de gevallen voor. Voor de meeste slachtoffers (83.3%) was de pleger een bekende; meestal een leeftijdsgenoot of een nabij persoon.

Tabel 2. *Kenmerken van het seksueel geweld en de pleger, gerapporteerd door slachtoffers (N = 108) op het moment van aanmelding in aantallen en percentages.*

|                                               | N   | %    |
|-----------------------------------------------|-----|------|
| Type seksueel geweld                          |     |      |
| Vaginaal                                      | 53  | 49.1 |
| Oraal                                         | 7   | 6.5  |
| Anaal                                         | 4   | 3.7  |
| Meervoudig                                    | 37  | 34.2 |
| Geen penetratie                               | 7   | 6.5  |
| Parallele aanwezigheid van fysiek geweld      | 32  | 29.6 |
| Gebruik van alcohol of drugs door slachtoffer | 24  | 22.2 |
| Geslacht van pleger                           |     |      |
| Vrouw                                         | 1   | 0.9  |
| Man                                           | 107 | 99.1 |
| (Geschatte) leeftijdscategorie van pleger     |     |      |
| Minderjarigen (< 18 jaar)                     | 27  | 13.9 |
| Volwassenen                                   | 80  | 86.1 |
| Aantal plegers                                |     |      |
| 1                                             | 82  | 75.9 |
| > 1                                           | 26  | 24.1 |
| Relatie slachtoffer-pleger                    |     |      |
| Leeftijdsgenoten <sup>a</sup>                 | 25  | 23.1 |
| Intiem                                        | 19  | 17.6 |
| Onbekende <sup>b</sup>                        | 18  | 16.7 |
| Mensenhandel                                  | 12  | 11.1 |
| Kenniss                                       | 12  | 11.1 |
| Professional                                  | 10  | 9.3  |
| Familie                                       | 6   | 5.6  |
| Prostitutie                                   | 3   | 2.8  |
| Internet contact                              | 3   | 2.8  |

<sup>a</sup> Leeftijdsgenoot verwijst naar een niet-romantische relatie met een persoon van soortgelijke leeftijd.

<sup>b</sup> Onbekende is gedefinieerd als een persoon die niet eerder contact heeft gehad met het slachtoffer.

*Gebruik van voorzieningen*

De voorzieningen van het centrum worden geleverd door drie samenwerkende disciplines: medisch, forensisch (met inbegrip van forensisch-medisch onderzoek) en psychologisch. Bij tien patiënten (9.3%) is slechts één discipline ingezet, 29 patiënten (26.9%) gebruikten voorzieningen uit twee disciplines en 69 patiënten (63.9%) maakten gebruik van de voorzieningen van alle drie disciplines. De meerderheid van de patiënten (88.9%,  $n = 96$ ) presenteerde zich binnen 72 uur na de verkrachting, terwijl 11.1% ( $n = 12$ ) zich vier tot zes dagen na de verkrachting meldde. Bijzonderheden ten aanzien van het gebruik van voorzieningen zijn gepresenteerd in Tabel 3. Medische zorg werd door 82.4% van de patiënten gebruikt; in deze groep gaf iedereen aan een penetratie te hebben meegemaakt. Bij 23.1% ( $n = 6$  genitale;  $n = 19$  niet-genitale) van de patiënten werd lichamelijk letsel geconstateerd, waarvan 32% ( $n = 8$ ) behandeling behoefde. Van de 50 patiënten aan wie PEP medicatie werd verstrekt, heeft 54% het behandelingschema niet voltooid vanwege ernstige bijwerkingen ( $n = 3$ ), interactie met andere voorgeschreven medicatie ( $n = 1$ ), negatieve HIV-uitslag bij de verdachte ( $n = 2$ ), subjectieve stress bij de patiënt ( $n = 2$ ), onwetendheid met betrekking tot het gebruik van medicatie ( $n = 1$ ), eigen risico-inschatting van de patiënt als laag ( $n = 1$ ) of onbekende redenen ( $n = 17$ ). Van de patiënten die een zwangerschapstest ondergingen, bleek één volwassen vrouw zwanger te zijn.

Wat de forensische voorzieningen betreft, heeft 61.7% van de patiënten een forensisch-medisch onderzoek ondergaan. Aangifte werd gedaan door 34% van de patiënten.

Case-management werd toegewezen aan 82.4% van de slachtoffers; dit gebeurde relatief vaker bij minderjarigen en hun ouders ( $n = 42$ ) dan bij volwassenen ( $n = 47$ ). Aan 38.9% van de patiënten is binnen twee maanden na de verkrachting een *evidence-based* behandeling voor PTSS aangeboden volgens de internationale richtlijnen (NICE, 2005). Vier minderjarigen zijn na bezoek in het centrum onder toezicht gesteld van Bureau Jeugdzorg.

Tabel 3. Kenmerken van het gebruik van voorzieningen (medisch, forensisch en psychologisch) door slachtoffers na seksueel geweld ( $N = 108$ ) in aantallen en percentages.

|                                                               | <i>N</i> | %    |
|---------------------------------------------------------------|----------|------|
| Eerder gebruik van het Centrum Seksueel Geweld                | 4        | 3.7  |
| <i>Medische voorzieningen</i>                                 |          |      |
| Acute medische zorg                                           | 89       | 82.4 |
| Betrokken specialisten (elkaar niet uitsluitende groepen)     |          |      |
| Infectioloog                                                  | 69       | 63.8 |
| Gynaecoloog – alleen vrouwen geïncludeerd ( $n = 99$ )        | 12       | 12.1 |
| Kinderarts – alleen minderjarigen geïncludeerd ( $n = 47$ )   | 36       | 76.6 |
| Beoordeling op aanwezigheid van SOA's (inclusief Hepatitis C) | 82       | 75.9 |
| Toegediende medische handelingen                              |          |      |
| Antibiotica                                                   | 74       | 68.5 |
| Hepatitis B immunisatie                                       | 69       | 63.8 |
| HIV Postexposure Prophylaxis (PEP)                            | 50       | 46.3 |
| Morning after pil – alleen vrouwen geïncludeerd ( $n = 99$ )  | 36       | 36.4 |

|                                                                             |    |      |
|-----------------------------------------------------------------------------|----|------|
| <i>Forensische voorzieningen</i>                                            |    |      |
| Betrokkenheid politie                                                       | 92 | 85.2 |
| Forensisch-medisch onderzoek ondergaan                                      | 66 | 61.7 |
| Aangifte                                                                    | 36 | 34.0 |
| <i>Psychologische voorzieningen</i>                                         |    |      |
| Gebruik van case-management                                                 | 89 | 82.4 |
| Behandeling PTSS                                                            | 42 | 38.9 |
| Parallele ouderbegeleiding – alleen minderjarigen geïncludeerd ( $n = 47$ ) | 34 | 72.3 |

## Discussie

De bevindingen tonen aan dat de meeste slachtoffers die zich binnen één week na de verkrachting in het multidisciplinaire Centrum Seksueel Geweld UMCU presenteren, vrouwen tussen 12 en 25 jaar oud zijn die een verkrachting hebben meegemaakt door een bekende volwassen man. Dit is in lijn met resultaten uit Nederlands bevolkingsonderzoek (De Haas et al., 2012), waaruit blijkt dat adolescentie-leeftijd en vrouw zijn risicofactoren zijn voor het meemaken van seksueel geweld. De slachtoffers rapporteerden in hoge mate eerdere victimisering, bestaand gebruik van de 1<sup>e</sup>, 2<sup>e</sup>, en 3<sup>e</sup> lijns geestelijke gezondheidszorg, gebruik van voorgeschreven medicatie en ongunstige leefomstandigheden. Met het laatste wordt bedoeld op tijdelijke of begeleide huisvesting en het ontbreken van steun van het ouderlijk systeem. Het gebruik van de voorzieningen van de drie samenwerkende disciplines in het centrum was aanzienlijk en een derde besloot aangifte te doen bij de politie. De multidisciplinaire aanpak lijkt daarmee goed aan te sluiten bij deze doelgroep met ernstige problemen op verschillende terreinen. Hoewel de Nederlandse aanpak voor acute slachtoffers recent pas is gewijzigd van gefragmenteerd naar gecoördineerd en geïntegreerd, komen de kenmerken van de huidige onderzoekspopulatie overeen met die van de populatie die zich meldt bij de al langer bestaande *Rape Centers* in Denemarken en de Verenigde Staten (Avegno, Mills, & Mills, 2009; Brown, Du Mont, MacDonald, & Bainbridge, 2013; Ingemann-Hansen, Sabroe, Brink, Knudsen, & Charles, 2009).

Een groot deel van de slachtoffers rapporteerde eerdere victimisering en reeds bestaand gebruik van geestelijke gezondheidszorg, in lijn met eerdere studies onder acute slachtoffers van seksueel geweld (Brown et al., 2013; Campbell, Keegan, Cybulska, & Forster, 2007; Elwood et al., 2011). Deze kenmerken, evenals de bevinding dat de meeste minderjarigen niet bij beide biologische ouders wonen, houden verband met een verhoogd risico op het ontstaan van PTSS en revictimisatie (Classen, Palesh, & Aggarwal, 2005; McLaughlin et al., 2013; Walsh et al., 2012). Herkenning van deze risicofactoren en toepassing van adequate psychologische interventies is noodzakelijk om revictimisering te voorkomen en psychisch herstel te bevorderen.

Vierenzestig procent van de populatie maakte gebruik van de voorzieningen van alle drie disciplines: medisch, forensisch en psychologisch. Dit hoge percentage weerspiegelt de behoeftes van slachtoffers van seksueel geweld in de acute fase. Zo was de inzet van acute medische zorg aanzienlijk, omdat zwangerschap en besmetting met SOA de grootste

bedreiging vormen voor slachtoffers van seksueel geweld. Bij 25% van de slachtoffers werd algemeen fysiek letsel geconstateerd. Dit percentage is lager dan de bevindingen uit eerder onderzoek, waaruit naar voren kwam dat fysiek letsel vaker voorkomt bij slachtoffers van verkrachting door een onbekende (Riggs, Houry, Long, Markovchick, & Feldhaus, 2000); in onze studie was het percentage onbekende verdachten relatief laag. Er zijn verschillende verklaringen mogelijk voor de bevinding dat in slechts 6% van de gevallen genitaal letsel gevonden is, terwijl bij 83.3% sprake zou zijn van penetratie. De colposcoop werd niet routinematig gebruikt bij volwassenen, wat mogelijk resulteerde in minder vaak gedocumenteerd letsel. Het is ook mogelijk dat de onderzoekspopulatie veelal bestond uit personen met eerdere seksuele ervaringen (Grossin et al., 2003). Anderzijds zijn in eerdere studies bij kinderen lage percentages genitaal letsel gevonden (Palusci, Cox, Shatz, & Schultze, 2006). Wat betreft het gebruik van PEP-medicatie heeft de helft van de patiënten het behandelingschema niet voltooid, ondanks educatie gericht op het gebruik en de bijwerkingen van PEP. Daarom zijn gezamenlijke inspanningen nodig om de therapietrouw te verbeteren.

De bevinding dat één derde van de slachtoffers aangifte deed bij de politie is hoger dan de nationale aangifte percentages van 10% (Merens et al., 2012). Dit kan enerzijds verklaard worden door het feit dat de politie de belangrijkste verwijzer was voor het centrum, anderzijds zou de integrale aanpak van voorzieningen kunnen leiden tot een grotere bereidheid van het slachtoffer om aangifte te doen (Campbell et al., 2012). Nauwe samenwerking van de verschillende disciplines, die opgeleid zijn en met voldoende regelmaat specialistisch werk verrichten, blijkt in de Verenigde Staten ‘*victim blaming*’ te voorkomen (Campbell et al., 2012). Nader onderzoek is nodig om te bezien in hoeverre een multidisciplinaire aanpak de aangiftebereidheid ook in Nederland kan doen toenemen.

Deze studie is opgezet om informatie te verzamelen over de kenmerken van slachtoffers en hun gebruik van voorzieningen om daarmee het huidige zorgaanbod te verbeteren. Hoewel nagenoeg alle patiënten gebruik maakten van preventieve psychologische zorg in de vorm van ‘*watchful waiting*’, is het maar de vraag of dit type zorg passend en afdoende is geweest. ‘*Watchful waiting*’ is gebaseerd op de veronderstelling dat de meeste slachtoffers na een traumatische gebeurtenis binnen een paar weken zullen herstellen zonder behandeling. Dit is echter niet de verwachting in de huidige populatie; uit de huidige studie blijkt dat veel slachtoffers een verhoogd risico op PTSS en revictimisering hebben door eerder trauma, het ontbreken van steun van het ouderlijk systeem en reeds betrokken hulpverlening wat het bestaan van premorbide psychische of psychiatrische problematiek suggereert (Acierno, Resnick, Kilpatrick, Saunders, & Best, 1999; Elwood et al., 2011; Littleton et al., 2009; McLaughlin et al., 2013; Rees et al., 2011; Walsh et al., 2012). Daarom zou de huidige psychologische zorg moeten worden geïntensiveerd door direct *evidence-based* te behandelen met CGT of EMDR, gericht op het verwerken van de meest recente traumatische herinneringen. Tot op heden zijn verschillende pilotstudies verricht naar het effect van kortdurende psychologische interventies bij volwassen slachtoffers van een recente verkrachting. Een studie onder vrouwelijke slachtoffers vond bij follow-up van negen maanden na behandeling dat zowel door vroegtijdige CGT als ondersteunende begeleiding PTSS-symptomen verminderen, en dat CGT het herstelproces bevorderde (Foa, Zoellner, & Feeny, 2006). Een meer recente studie vond ook ondersteuning voor het effect van een korte cognitieve-gedragstherapeutische interventie direct na een verkrachting (Zoellner, Feeny,

Eftekhari & Foa, 2011). Een video-interventie bestaande uit psycho-educatie voorafgaand aan het forensisch sporenonderzoek bleek effectief in het voorkomen van het ontstaan van psychopathologie bij slachtoffers van verkrachting (Resnick et al., 2007). Tot slot, de bevindingen van een haalbaarheidsstudie naar de toepassing van EMDR voor slachtoffers die zich bij de Spoed Eisende Hulp meldden direct na een verkrachting lieten een afname zien van posttraumatische stressreacties en seksuele problemen; dit effect bleef zes maanden na de therapie stabiel (Tarquinio, Brennstuhl, Reichenbach, Rydberg, & Tarquinio, 2012).

Ondanks de bemoedigende resultaten van voornoemde studies, bestaat er tot op heden geen duidelijke *evidence-based* preventieve interventie voor jonge en volwassen slachtoffers van een recente verkrachting. De behoefte aan preventieve interventies wordt ondersteund door bevindingen die suggereren dat hulpverlening zich primair dient te focussen op het verminderen van PTSS symptomen, omdat comorbide klachten daardoor ook afnemen (Nickerson et al., 2012). In de huidige studie ontving 39% van zowel minderjarige als volwassen patiënten CGT of EMDR, maar niet direct na trauma. Longitudinaal onderzoek kan informatie genereren over de optimale *timing* van behandeling en de mate van psychisch herstel, niet alleen ten aanzien van PTSS symptomatologie maar ook van depressie, angst en seksuele problemen. Verder zou in toekomstige effectstudies naar vroegtijdige interventies de aandacht moeten uitgaan naar dissociatie, omdat de aanwezigheid van dissociatie tijdens de eerste behandelsessie verband houdt met een verminderde respons op vroegtijdige interventies (Price, Kearns, Houry & Rothbaum, 2014). Bovendien toont een meta-analyse door Ozer, Best, Lipsey, and Weiss (2003) aan dat dissociatie de sterkste voorspeller voor PTSS is, vergeleken met andere predictoren zoals eerder trauma, eerdere psychopathologie, familiegeschiedenis van psychopathologie, ervaren dreiging tijdens het trauma en aanwezigheid van sociale steun na het trauma.

Deze studie heeft een aantal beperkingen. Ten eerste vermoeden we dat er sprake is van onderrapportage voor wat betreft het hebben meegemaakt van eerder trauma, omdat patiënten zijn gevraagd naar hun achtergrond alvorens een vertrouwensrelatie te hebben opgebouwd met de betrokken professional. Ten tweede zijn de forensisch-medische onderzoeken bij kinderen en volwassenen niet altijd op dezelfde wijze uitgevoerd. Bij kinderen werd standaard top-tot-teen onderzoek gedaan. Bij volwassen slachtoffers daarentegen werd de focus van het forensisch-medisch onderzoek bepaald op grond van het verhaal van het slachtoffer, wat kan hebben geresulteerd in minder nauwkeurig gedocumenteerd letsel bij volwassenen (Ingemann-Hansen et al., 2009). Ondanks deze beperkingen, is dit de eerste studie in Nederland die zowel bij minderjarigen als volwassenen uitgebreid de kenmerken van slachtoffers beschrijft en hun gebruik van voorzieningen in een daarvoor aangewezen Centrum Seksueel Geweld. De huidige studie dient te worden beschouwd als een eerste stap naar breder onderzoek naar kenmerken van slachtoffers, de impact van verkrachting en effectiviteit van behandeling.

Samengevat bestaat de populatie die gebruik maakt van het Centrum Seksueel Geweld voornamelijk uit jonge vrouwen met achtergrondkenmerken, die het risico op het ontstaan van PTSS en revictimisatie verhogen. Daarom is passende psychologische zorg noodzakelijk om revictimisering te voorkomen en psychisch herstel te bevorderen. Mogelijk kunnen de huidige psychologische voorzieningen verbeterd worden door de traumabehandeling direct te richten op reductie van PTSS symptomen. Daarnaast kan verbetering van de forensische

voorzieningen kan bereikt worden door standaard top-tot-teen forensisch-medisch onderzoek te verrichten bij zowel kinderen als volwassenen. Toekomstig onderzoek, waarin significant meer slachtoffers worden geïncludeerd, zal erop gericht moeten zijn het mogelijke voordeel van de Centra Seksueel Geweld voor de (psychische) gezondheid en het juridisch proces verder in kaart te brengen. Een volgende stap is ook om (potentiele) slachtoffers en verwijzers te gaan informeren over het aanbod van de gespecialiseerde centra. Het Centrum Seksueel Geweld in Utrecht beschikt over een website ([www.centrumseksueelgeweld.nl](http://www.centrumseksueelgeweld.nl)) en kan dag en nacht via één telefoonnummer worden bereikt (088-7555588).

### Dankbetuiging

De auteurs danken Riemke Postma voor haar ondersteuning bij het voorbereiden van dit manuscript. Dit onderzoek is mogelijk gemaakt door subsidie van Fonds Slachtofferhulp Nederland.

### Referenties

- Acierno, R., Resnick, H., Kilpatrick, D. G., Saunders, B., & Best, C. L. (1999). Risk factors for assault, physical assault, and posttraumatic stress disorder in women: Examination of differential multivariate relationships. *Journal of Anxiety Disorders, 13*(6), 541-563.
- Alisic, E., Jongmans, M. J., van Wesel, F., & Kleber, R. J. (2011). Building child trauma theory from longitudinal studies: A meta-analysis. *Clinical Psychology Review, 31*(5), 736-747.
- Avegno, J., Mills, T. J., & Mills, L. D. (2009). Sexual assault victims in the emergency department: analysis by demographic and event characteristics. *The Journal of Emergency Medicine, 37*(3), 328-334.
- Bramsen, R. H., Elklit, A., & Nielsen, L. H. (2009). A Danish model for treating victims of assault and sexual assault: the multidisciplinary public approach. *Journal of Aggression, Maltreatment & Trauma, 18*(8), 886-905.
- Brown, R., Du Mont, J., Macdonald, S., & Bainbridge, D. (2013). A comparative analysis of victims of sexual assault with and without mental health histories: Acute and follow-up care characteristics. *Journal of Forensic Nursing, 9*(2), 76-83.
- Bryant, R. A., & Panasetis, P. (2001). Panic symptoms during trauma and acute stress disorder. *Behaviour Research and Therapy, 39*(8), 961-966.
- Campbell, L., Keegan, A., Cybulska, B., & Forster, G. (2007). Prevalence of mental health problems and deliberate self-harm in complainants of sexual violence. *Journal of Forensic and Legal Medicine, 14*(2), 75-78.

- Campbell, R., Patterson, D., & Lichty, L. F. (2005). The Effectiveness of Sexual Assault Nurse Examiner (SANE) Programs A Review of Psychological, Medical, Legal, and Community Outcomes. *Trauma, Violence, & Abuse*, 6(4), 313-329.
- Campbell, R., Patterson, D., Adams, A. E., Diegel, R., & Coats, S. (2008). A participatory evaluation project to measure SANE nursing practice and adult sexual assault patients' psychological well-being. *Journal of Forensic Nursing*, 4(1), 19-28.
- Campbell, R., Patterson, D., & Bybee, D. (2012). Prosecution of adult sexual assault cases a longitudinal analysis of the impact of a sexual assault nurse examiner program. *Violence against Women*, 18(2), 223-244.
- Campbell, R., & Wasco, S. (2005). Understanding rape and sexual assault. 20 years of progress and future directions. *Journal of Interpersonal Violence*, 20(1), 127-131.
- Classen, C. C., Palesh, O. G., & Aggarwal, R. (2005). Sexual revictimization: a review of the empirical literature. *Trauma, Violence & Abuse*, 6(2), 103-129.
- De Haas, S., Van Berlo, W., Bakker, F., & Vanwesenbeeck, I. (2012). Prevalence and characteristics of sexual violence in the Netherlands, the risk of revictimization and pregnancy: Results from a national population survey. *Violence and Victims*, 27(4), 592-608.
- Elwood, L. S., Smith, D. W., Resnick, H. S., Gudmundsdottir, B., Amstadter, A. B., Hanson, R. F., ... Kilpatrick, D. G. (2011). Predictors of assault: findings from the national survey of adolescents. *Journal of Traumatic Stress*, 24(2), 166-173.
- Ensink, B., & Van Berlo, W. (1999). *Indringende herinneringen. De ontwikkeling van klachten na een verkrachting [Intrusive memories: Development of psychological problems after sexual assault]*. Utrecht: NISSO/Delft: Eburon.
- Foa, E. B., Zoellner, L. A., & Feeny, N. C. (2006). An evaluation of three brief programs for facilitating recovery after assault. *Journal of Traumatic Stress*, 19(1), 29-43.
- Goderie, M., & Flikweert, M. (2012). *Zorgcoördinatie voor slachtoffers van verkrachting in Amsterdam: verslag van een pilot*. Utrecht: Verwey-Jonker Instituut.
- Grossin, C., Sibille, I., Lorin de la Grandmaison, G., Banasr, A., Brion, F., & Durigon, M. (2003). Analysis of 418 cases of sexual assault. *Forensic Science International*, 131(2), 125-130.
- Ingemann-Hansen, O., Sabroe, S., Brink, O., Knudsen, M., & Charles, A. V. (2009). Characteristics of victims and assaults of sexual violence—improving inquiries and prevention. *Journal of Forensic and Legal Medicine*, 16(4), 182-188.

- Linden, J. A. (2011). Care of the adult patient after sexual assault. *New England Journal of Medicine*, 365(9), 834-841.
- Littleton, H., Axsom, D., & Grills-Taquechel, A. (2009). Sexual assault victims' acknowledgment status and revictimization risk. *Psychology of Women Quarterly*, 33(1), 34-42.
- McLaughlin, K. A., Koenen, K. C., Petuhkova, M., Sampson, N. A., Zaslavsky, A. M., & Kessler, R. C. (2013). Trauma exposure and posttraumatic stress disorder in a national sample of adolescents. *Journal of the American Academy of Child and Adolescent Psychiatry*, 52(8), 815-830.
- Merens, A., Hartgers, M., & Van den Brakel, M. (2012). *Emancipatiemonitor 2012*. Den Haag: Sociaal en Cultureel Planbureau & Centraal Bureau voor de Statistiek. Retrieved from:  
<http://www.cbs.nl/nl-NL/menu/themas/dossiers/vrouwen-en-mannen/publicaties/publicaties/archief/2012/emancipatiemonitor-2012-pub.html>.
- National Institute for Clinical Excellence (2005). *Posttraumatic Stress Disorder (PTSD): the management of PTSD in adults and children in primary and secondary care, report nr 26*. London: Gaskell.
- Nickerson, A., Steenkamp, M., Aerka, I. M., Salters-Pedneault, K., Carper, T. L., Barnes, J. B., & Litz, B. T. (2012). Prospective investigation of mental health following sexual assault. *Depression and Anxiety*, 30(5), 483-488.
- Ozer, E.J., Best, S.R., Lipsey, T.L., & Weiss, D.S. (2003). Predictors of posttraumatic stress disorder and symptoms in adults: a meta-analysis. *Psychological Bulletin*, 129(1):52-73.
- Palusci, V. J., Cox, E. O., Shatz, E. M., & Schultze, J. M. (2006). Urgent medical assessment after child sexual abuse. *Child Abuse & Neglect*, 30(4), 367-380.
- Postma, R., Bicanic, I., Vaart, H., & Laan, E. (2013). Pelvic Floor Muscle Problems Mediate Sexual Problems in Young Adult Rape Victims. *The Journal of Sexual Medicine*, 10(8), 1978-1987.
- Price, M., Kearns, M., Houry, D., & Rothbaum, B.O. (2014). Emergency department predictors of posttraumatic stress reduction for trauma-exposed individuals with and without an early intervention. *Journal of Consulting and Clinical Psychology*, 82(2):336-41.
- Rees, S., Silove, D., Chey, T., Ivancic, L., Steel, Z., Creamer, M., ... Forbes, D. (2011). Lifetime prevalence of gender-based violence in women and the relationship with

- mental disorders and psychosocial function. *Journal of the American Medical Association*, 306(5), 513-521.
- Resnick, H., Acierno, R., Waldrop, A.E., King, L., King, D., Danielson, C., Ruggiero, K.J., & Kilpatrick, D. (2007). Randomized controlled evaluation of an early intervention to prevent post-rape psychopathology. *Behaviour Research and Therapy*, 45(10):2432-47.
- Riggs, N., Houry, D., Long, G., Markovchick, V., & Feldhaus, K. M. (2000). Analysis of 1,076 cases of sexual assault. *Annals of Emergency Medicine*, 35(4), 358-362.
- Risser, H. J., Hetzel-Riggin, M. D., Thomsen, C. J., & McCanne, T. R. (2006). PTSD as a mediator of sexual revictimization: The role of reexperiencing, avoidance, and arousal symptoms. *Journal of Traumatic Stress*, 19(5), 687-698.
- Tarquinio, C., Brennstuhl, M. J., Reichenbach, S., Rydberg, J. A., & Tarquinio, P. (2011). Early treatment of rape victims: Presentation of an emergency EMDR protocol. *Sexologies*, 21(3), 113-121.
- Vanoni, M., Kriek, F., & Lunneman, K. (2013). *Meerwaarde integrale opvang en hulpverlening aan slachtoffers van seksueel geweld. Exploratief onderzoek naar de Centra Seksueel Geweld in Utrecht en Nijmegen*. Regioplan Beleidsonderzoek in samenwerking met Verweij-Jonker.
- Walsh, K., Danielson, C. K., McCauley, J. L., Saunders, B. E., Kilpatrick, D. G., & Resnick, H. S. (2012). National prevalence of posttraumatic stress disorder among sexually revictimized adolescent, college, and adult household-residing women. *Archives of General Psychiatry*, 69(9), 935-942.
- Zoellner, L.A., Feeny, N.C., Eftekhari, A., & Foa, E.B. (2011). Changes in negative beliefs following three brief programs for facilitating recovery after assault. *Depression and Anxiety*, 28(7):532-40.
- Wolitzky-Taylor, K. B., Resnick, H. S., Amstadter, A. B., McCauley, J. L., Ruggiero, K. J., & Kilpatrick, D. G. (2011). Reporting assault in a national sample of college women. *Journal of American College Health*, 59(7), 582-587.
