# Supplementary material
Source: publisher figshare collection journal article supplement (https://tandf.figshare.com/articles/dataset/_/21829413)
Supplement: Supplementary file 2 [file 1]

## **El uso de servicios profesionales por parte de las víctimas en un centro de agresión sexual holandés**

Iva Bicanic, Hanneke Snetselaar, Ad De Jongh, Elise Van de Putte

**Antecedentes:** Las investigaciones anteriores promovían el establecimiento de centros de agresión sexual en Holanda debido al beneficio potencial para la recuperación mental de las víctimas. En 2012, se fundó el primer centro holandés de agresión sexual en el centro médico universitario de Utrecht. El objetivo de este centro es ofrecer servicios coordinados e integrados (es decir, médico, forense y psicológico) 24 horas al día, siete días a la semana en un solo lugar.

**Objetivo:** El objetivo del presente estudio era describir las características demográficas, de antecedentes y de las agresiones de las víctimas que visitan el centro una semana después de la agresión y su uso de los servicios post-agresión para poder mejorar los servicios actuales.

**Resultados:** la edad media era de 21.3 años (DE = 9.8). La mayoría de las víctimas eran mujeres (91.7%). Una gran proporción de víctimas informó de características de su entorno que se sabe aumentan el riesgo de trastorno de estrés postraumático (TEPT) y la revictimización, tal como el abuso sexual previo (32.4%), el uso previo de servicios de salud mental (45.4%) y no convivir con ambos padres biológicos (61.7%). La mayoría de los pacientes (88.9%) consultaron con el centro en las 72 horas posteriores a la agresión. La aceptación de los servicios fue alta: el 82.4% recibieron atención médica de emergencia, el 61,7% fueron sometidas a un examen médico forense, el 34% puso una denuncia en la policía y el 82,4% utilizaron servicios psicológicos.

**Conclusiones:** Para evitar la revictimización y el trastorno de estrés postraumático, los servicios psicológicos actuales podrían mejorarse con tratamientos inmediatos centrados en el trauma. Los servicios forenses actuales podrían mejorarse con exámenes médicos-forenses estándar de la cabeza a los pies para niños y adultos.

**Keywords:** agresión; agresión sexual; atención de emergencia; salud mental; trastorno de estrés postraumático (TEPT)

Name of translator: Miriam Ramos Morrison

Citation: European Journal of Psychotraumatology 2014, 5: 23645 - <http://dx.doi.org/10.3402/ejpt.v5.23645>
