# Supplementary material
Source: publisher figshare collection journal article supplement (https://tandf.figshare.com/articles/dataset/_/21829413)
Supplement: Supplementary file 3 [file 1]

Iva Bicanic, Hanneke Snetselaar, Ad De Jongh, Elise Van de Putte

Stopień korzystania przez ofiary przemocy seksualnej z pomocy profesjonalnych służb w Duńskim Centrum Pomocy Ofiarom Wykorzystywania Seksualnego.

**Wprowadzenie:** Wcześniejsze badania wskazały na słuszność powołania centrów pomocy ofiarom wykorzystania seksualnego w Holandii z uwagi na pozytywny ich wpływ na zdrowie psychiczne ofiar. W 2012 r. w Danii powstało pierwsze centrum pomocy ofiarom wykorzystania seksualnego na Medycznym Uniwersytecie w Utrechcie. Celem tego centrum pomocy było udzielanie całodobowej pomocy 7 dni w tygodniu w jednym miejscu.

**Cel:** Celem niniejszej pracy jest przedstawienie demograficznych, środowiskowych oraz związanych z historią wykorzystania seksualnego charakterystyk ofiar korzystających z niniejszego centrum tydzień po wykorzystaniu w celu usprawnienia poziomu dotychczasowych usług centrum.

**Metoda:** Pomiędzy styczniem 2012 a wrześniem 2013 przeprowadzono badanie na 108 pacjentach tego centrum. W celu dokonania charakterystyki próby, policzono statystyki opisowe i proporcje dla różnych zmiennych kategorialnych.

**Wyniki:** Średni wiek badanych wyniósł 21.3 lata (SD - 9.8 lat). Większość ofiar były płci żeńskiej (91.7%). Duży odsetek badanych wskazywał na takie charakterystyki środowiska pochodzenia, które zwiększało ryzyko PTSD oraz wtórnej wiktymizacji poprzez wcześniejsze wykorzystanie seksualne (32.4%), wcześniejsze korzystanie z usług zdrowia psychicznego (45.4%) i brak wychowywania się z obiema biologicznymi rodzicami (61.7%). Większość pacjentów (89.9%) skonsultowała się z centrum w przeciągu 72 h po doświadczeniu wykorzystania seksualnego. Stopień otrzymanej pomocy był wysoki: 82.4% skorzystało z pomocy medycznej, 61.7% zostało medycznie przebadanych, 34% zgłosiło się na policję oraz 82.4% skorzystało z pomocy psychologicznej.

**Konkluzje:** Aby zapobiec wtórnej wiktymizacji i PTSD, obecne formy pomocy psychologicznej powinny zostać ulepszone poprzez natychmiastową terapię traumy. Obecne formy specjalistycznego leczenia mogą zostać ulepszone poprzez użycie standardowego, ogólnego badania medycznego kierowanego zarówno do dzieci, jak i dorosłych.

**Słowa kluczowe:** wykorzystanie; seksualne wykorzystanie; ostry dyżur; zdrowie psychiczne; PTSD

Name of translator: Marcin Rzeszutek, University of Finance and Management in Warsaw, Poland

**Citation:** European Journal of Psychotraumatology 2014, 5: 23645 - <http://dx.doi.org/10.3402/ejpt.v5.23645>
