# Supplementary material
Source: publisher figshare collection journal article supplement (https://tandf.figshare.com/articles/dataset/_/21829413)
Supplement: Supplementary file 4 [file 1]

## **Az ellátás kihasználtsága egy holland szexuális erőszak centrumban**

Iva Bicanic, Hanneke Snetselaar, Ad De Jongh, Elise Van de Putte

### **Abstract**

Háttér: Korábbi kutatások rámutattak a Hollandiában létesített szexuális támadások áldozatai számára létrehozott intézmények pozitív hatásaira az áldozatok felépülésében. 2012-ben alapították az első ilyen centrumot a University Medical Center Utrechtben. A centrum célja koordinált és integrált ellátást (pl. orvosi, igazságügyi, pszichológiai) nyújtani 24 órában, a hét minden napján, egy helyen.

Célkitűzés: A vizsgálat célja bemutatni a centrumban megjelenő egyének demográfiai, háttér és a támadással kapcsolatos jellemzőit a jelenlegi ellátás fejlesztésére.

Módszer: 2012 január és 2013 szeptember között 108 beteg adatait vették fel. A populáció leírására gyakorisági számokat és arányokat kódoltak kategorikus változók létrehozására.

Eredmények: Az átlag életkor 21,3 év (SD = 9,8). Az áldozatok többsége nő (91,7%). Az áldozatok nagy része olyan háttértényezőkről számolt be, amelyek növelik a PTSD és az újabb traumás esemény előfordulásának kockázatát, pl. korábbi szexuális erőszak (32,4%), korábbi mentális egészségügyi ellátás (45,4%), nem mindkét biológiai szülővel való együttélés (61,7%). A legtöbb beteg (88,9%) a támadást követő 72 órában kereste fel a centrumot. A szolgáltatások igénybevétele magas volt: 82,4% sürgősségi orvosi ellátásban részesült, 61,7% igazságügyi vizsgálaton vett részt, 34% feljelentést tett a rendőrségen, és 82,4% részt vett pszichológiai kezelésen.

Következtetések: A PTSD megelőzésére a jelenlegi pszichológiai ellátás továbbfejleszthető az azonnali trauma-fókuszú intervenciókkal. A jelenlegi igazságügyi ellátás kiterjeszthető lenne egy teljes testre kiterjedő vizsgálattal mind gyermekeknél és felnőtteknél.

**Keywords:** bántalmazás, szexuális támadás, sürgősségi ellátás, mentális egészség, poszttraumás stressz zavar

Name of translator: Kinga Fodor

Citation: European Journal of Psychotraumatology 2014, 5: 23645 - <http://dx.doi.org/10.3402/ejpt.v5.23645>
