# Supplementary material
Source: publisher figshare collection journal article supplement (https://tandf.figshare.com/articles/dataset/_/21829413)
Supplement: Supplementary file 5 [file 1]

## **Hollanda'daki bir Cinsel Saldırı Merkezi'ndeki uzman hizmetlerin mağdurlar tarafından kullanımı**

Iva Bicanic, Hanneke Snetselaar, Ad De Jongh, Elise Van de Putte

### **Özet**

**Arkaplan:** Önceki araştırmalar mağdurların zihinsel iyileşmesi için olası yararları nedeniyle Hollanda'da cinsel saldırı merkezlerinin kurulmasını desteklemiştir. 2012'de, Hollanda'daki ilk cinsel saldırı merkezi Utrecht Üniversite Tıp Merkezi'nde kurulmuştur. Merkezin amacı tek bir yerde 7/24 koordineli ve bütünlük hizmet (yani, tıbbi, adli ve psikolojik) sağlamaktır.

**Amaç:** Bu çalışmanın amacı merkezde saldırıdan bir hafta sonra görülen mağdurların demografik, kişisel geçmiş ve yaşadıklarının saldırının özelliklerini ve mevcut hizmetlerin iyileştirilmesi amacıyla saldırı sonrası hizmetleri kullanımını tanımlamaktır.

**Yöntem:** Ocak 2012 ve Eylül 2013 arasında 108 hastadan ileriye dönük veri toplanmıştır. Dahil edilen popülasyonu tanımlamak üzere, kategorik değişkenler için frekans sayımları ve oranlar oluşturulmuştur.

**Sonuçlar:** Ortalama yaş 21.3'tü (SS = 9.8). Mağdurların çoğu kadındı (%91.7). Mağdurların büyük bir bölümü travma sonrası stres bozukluğu (TSSB) ve önceki cinsel istismar öyküsü gibi yeniden maruz kalma riskini (%32.4), ruh sağlığının hizmetlerinin varolan kullanımını (%45.4) ve biyolojik ebeveynler ile yaşıyor olmamayı (%61.7) artırdığı bilinen kişisel geçmiş özellikleri bildirmiştir. Hastaların çoğu (%88.9) merkeze saldırıdan sonraki 72 saat içinde başvurmuştur.

Hizmetlerin kullanım oranı yüksekti: %82.4 acil tıbbi destek almıştır, %61.7 adli-tıbbi muayeneye tabi olmuştur, %34 polise bildirmiştir ve %82.4 psikolojik hizmetleri kullanmıştır. Tartışma: Yeniden maruz kalmayı ve TSSB'yi önlemek için, mevcut psikolojik hizmetler acil travma-odaklı tedaviler kullanılarak iyileştirilebilir. Mevcut adli hizmetler ise hem çocuklar hem yetişkinler için standart baştan aşağı adli-tıbbi muayenelerin kullanımı yoluyla iyileştirilebilir.

**Anahtar kelimeler:** saldırı; cinsel saldırı; acil bakım; ruh sağlığı; Travma Sonrası Stres Bozukluğu (TSSB)

Name of translator: Gözde İkizer

Citation: European Journal of Psychotraumatology 2014, 5: 23645 - <http://dx.doi.org/10.3402/ejpt.v5.23645>
