# Supplementary material
Source: publisher figshare collection journal article supplement (https://tandf.figshare.com/articles/dataset/_/21829413)
Supplement: Supplementary file 6 [file 1]

**Title:**荷兰性攻击受害者援助中心的专业服务使用情况调查

**Authors:** Iva Bicanic, Hanneke Snetselaar, Ad De Jongh, Elise Van de Putte

**Abstract**

背景：既往研究支持在荷兰建立性攻击受害者援助中心，因为有助于受害者的心理康复。2012 年，荷兰第一个性受害者援助中心在乌特勒支大学医学中心成立。中心成立的目的是提供 24/7 的协调整合服务（例如医学、司法及心理服务）。

目的：本研究目的是了解在受到攻击后 1 周内到达中心受害者的流行病学特征、背景及受到攻击的特点，以及受害者使用相关服务的情况，目的是改善目前服务。

方法：从 2012 年 1 月到 2013 年 9 月，有 108 人进入了研究。描述指标包括不同内容的频率和比例。

结果：平均年龄 21.3 岁(SD=9.8)。绝大多数受害者是女性（91.7%）。大部分受害者都存在增加 PTSD 的危险因素，或者是再次受害。例如既往遭受过性虐待的有 32.4%，曾经使用过精神卫生服务者 45.4%，没有与有亲生父母亲住在一起 61.7%。绝大多数受害者是在 72 小时内到达中心。接受服务的比例是高的：82.4%接受了紧急医疗服务，61.7%接受了司法医疗检查，34%报告了警察，82.4%使用了心理学服务。

结论：为了预防再次遭受伤害和发展为 PTSD，目前的心理学服务需要改善为紧急创伤治疗。目前的司法服务可以提高标准到儿童和成人都适合的司法医学检查水平。

**Keywords:** 攻击、性攻击、紧急治疗、精神健康、创伤后应激障碍

**Name of translator:** Zhonglin Tan

**Citation:**European Journal of Psychotraumatology 2014, 5: 23645 -  
<http://dx.doi.org/10.3402/ejpt.v5.23645>
